# Supplementary material
Source: Springer Nature journal article supplement (https://www.springermedizin.de/resource/supplementary/12936_2012_2452_MOESM3_ESM.pdf/9543048)

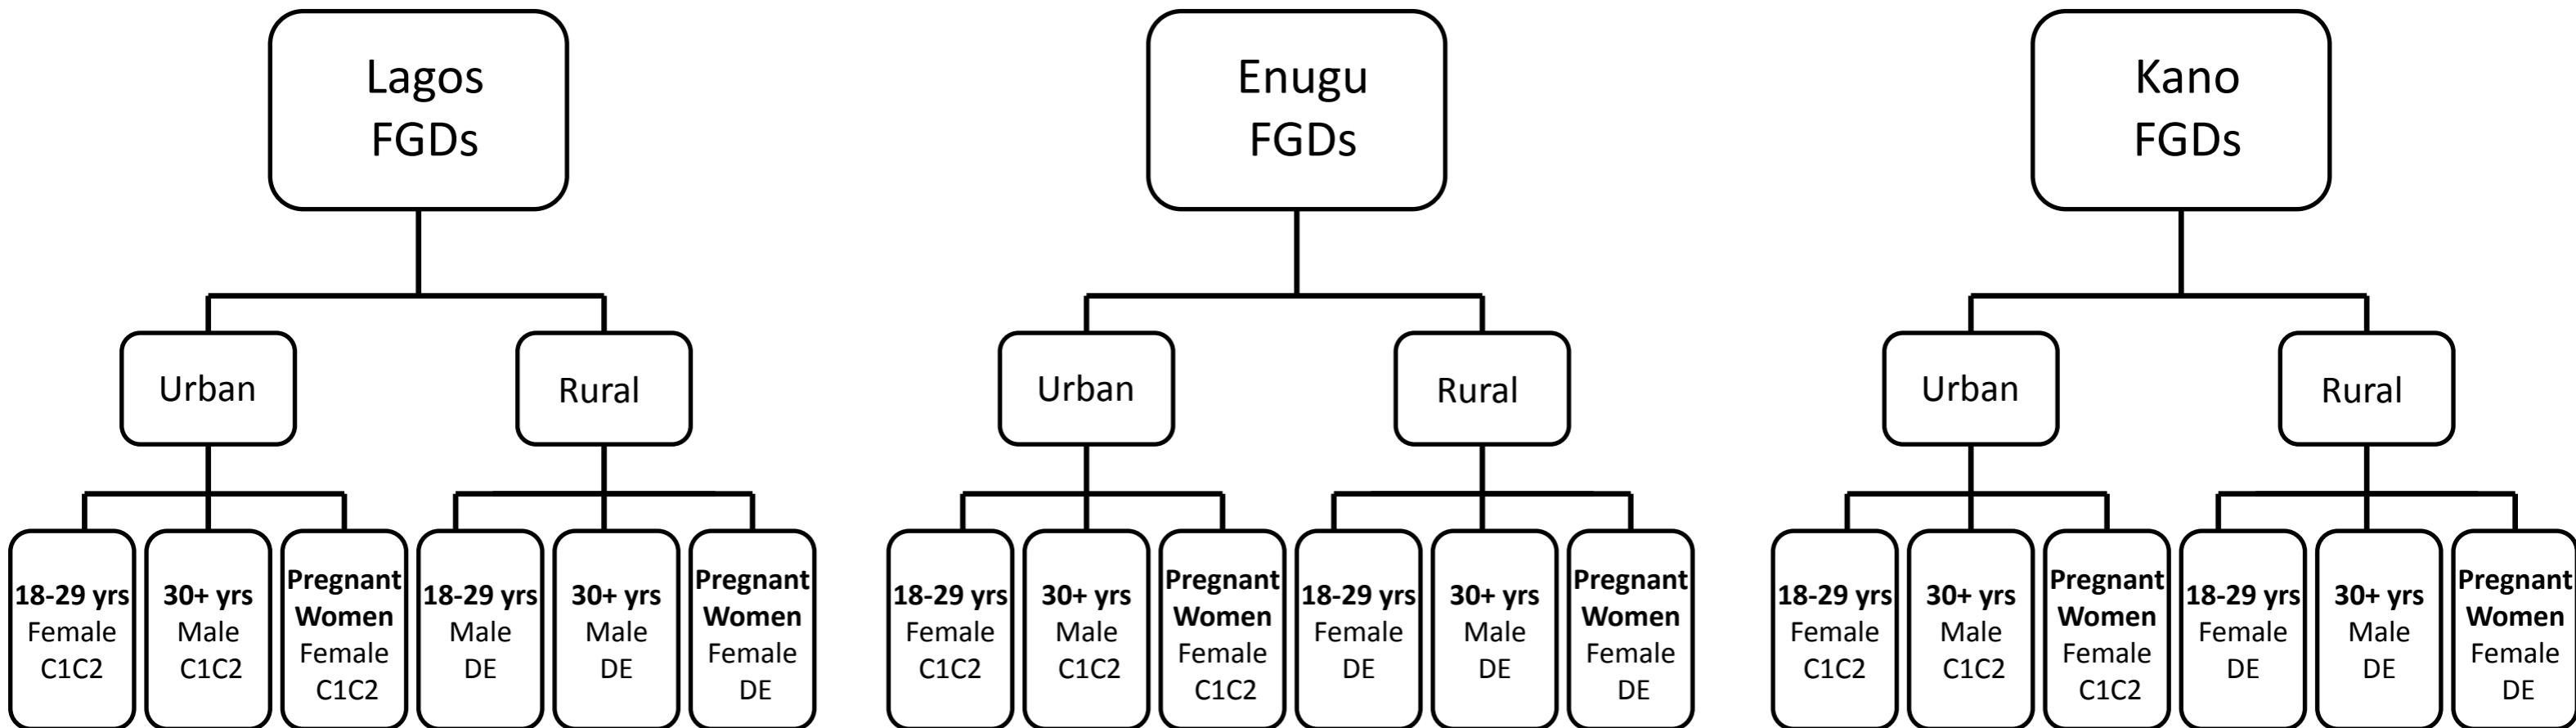

C1 = lower middle class  
 C2 = skilled working class  
 D = working class  
 E = underclass

Supplement: MOESM3 [file 9543048]
